# Supplementary material for: Undetectable equals untransmittable (U = U): awareness and associations with health outcomes among people living with HIV in 25 countries
Source: PubMed Central journal article supplement — Sex Transm Infect. 2020 Jul 30;97(1):18–26. doi: 10.1136/sextrans-2020-054551 (PMC7841488; doi:10.1136/sextrans-2020-054551), 2020-07-30
Supplement: sextrans-2020-054551supp001.pdf [file sextrans-2020-054551supp001.pdf]

Online supplementary table 1. Respondent recruitment source/channel, overall and by country, Positive Perspectives Study, 2019

| Country                    | Panel/<br>community<br>members | HIV<br>patient<br>support<br>groups/<br>charities | Local<br>Operating<br>Company<br>contacts | Patient-<br>to-<br>patient<br>referrals | Social<br>media | Languages                             | Total<br>participants | Total<br>days of<br>recruitment | End date       |
|----------------------------|--------------------------------|---------------------------------------------------|-------------------------------------------|-----------------------------------------|-----------------|---------------------------------------|-----------------------|---------------------------------|----------------|
| <i>Recruitment sources</i> |                                |                                                   |                                           |                                         |                 |                                       |                       |                                 |                |
| USA                        | 132                            | 254                                               | 0                                         | 8                                       | 6               | English                               | <b>400</b>            | 115                             | 28-Jul         |
| Canada                     | 17                             | 62                                                | 1                                         | 30                                      | 10              | English,<br>Canadian French           | <b>120</b>            | 83                              | 23-Jul         |
| Mexico                     | 11                             | 49                                                | 0                                         | 0                                       | 3               | Latin American<br>Spanish             | <b>63</b>             | 75                              | 06-Aug         |
| Argentina                  | 4                              | 39                                                | 0                                         | 1                                       | 6               | Latin American<br>Spanish             | <b>50</b>             | 56                              | 18-Jul         |
| Brazil                     | 17                             | 39                                                | 0                                         | 1                                       | 1               | Brazilian<br>Portuguese               | <b>58</b>             | 87                              | 06-Aug         |
| Chile                      | 13                             | 35                                                | 0                                         | 0                                       | 2               | Latin American<br>Spanish             | <b>50</b>             | 56                              | 18-Jul         |
| United<br>Kingdom          | 67                             | 51                                                | 0                                         | 4                                       | 1               | English                               | <b>123</b>            | 112                             | 23-Jul         |
| Ireland                    | 8                              | 16                                                | 0                                         | 26                                      | 0               | English                               | <b>50</b>             | 104                             | 24-Jul         |
| France                     | 26                             | 2                                                 | 90                                        | 2                                       | 0               | French                                | <b>120</b>            | 63                              | 25-Jun         |
| Germany                    | 48                             | 61                                                | 0                                         | 10                                      | 1               | German                                | <b>120</b>            | 66                              | 30-Jun         |
| Italy                      | 30                             | 85                                                | 0                                         | 4                                       | 1               | Italian                               | <b>120</b>            | 76                              | 16-Jul         |
| Spain                      | 20                             | 21                                                | 70                                        | 9                                       | 0               | Spanish                               | <b>120</b>            | 64                              | 26-Jun         |
| Portugal                   | 2                              | 53                                                | 3                                         | 2                                       | 0               | Portuguese                            | <b>60</b>             | 69                              | 27-Jul         |
| Netherlands                | 3                              | 13                                                | 34                                        | 1                                       | 0               | Dutch                                 | <b>51</b>             | 90                              | 24-Jul         |
| Belgium                    | 8                              | 33                                                | 0                                         | 6                                       | 3               | French, Flemish                       | <b>50</b>             | 76                              | 07-Aug         |
| Austria                    | 16                             | 34                                                | 0                                         | 0                                       | 0               | German                                | <b>50</b>             | 74                              | 15-Aug         |
| Switzerland                | 0                              | 50                                                | 5                                         | 0                                       | 0               | French, German                        | <b>55</b>             | 84                              | 15-Aug         |
| Poland                     | 2                              | 44                                                | 0                                         | 4                                       | 0               | Polish                                | <b>50</b>             | 82                              | 13-Aug         |
| Russia                     | 81                             | 66                                                | 1                                         | 0                                       | 2               | Russian                               | <b>150</b>            | 120                             | 29-Jan         |
| South Africa               | 44                             | 114                                               | 0                                         | 0                                       | 21              | English,<br>Afrikaans, Zulu,<br>Sotho | <b>179</b>            | 85                              | 31-Jan         |
| Japan                      | 6                              | 69                                                | 0                                         | 0                                       | 0               | Japanese                              | <b>75</b>             | 56                              | 25-Jul         |
| South Korea                | 0                              | 50                                                | 0                                         | 0                                       | 0               | Korean                                | <b>50</b>             | 49                              | 18-Jul         |
| Taiwan                     | 1                              | 48                                                | 0                                         | 0                                       | 6               | Traditional<br>Chinese                | <b>55</b>             | 62                              | 31-Jul         |
| China                      | 15                             | 35                                                | 0                                         | 0                                       | 0               | Simplified<br>Chinese                 | <b>50</b>             | 33                              | 28-Jun         |
| Australia                  | 56                             | 64                                                | 0                                         | 0                                       | 0               | English                               | <b>120</b>            | 115                             | 16-Aug         |
| <b>Overall</b>             | <b>627</b>                     | <b>1387</b>                                       | <b>204</b>                                | <b>108</b>                              | <b>63</b>       | <b>20 languages</b>                   | <b>2389</b>           |                                 | 31-Jan<br>2020 |

**Description**

**Panel/community members (convenience sampling):** Ipsos recruitment partner (Opinion Health) specializes in recruiting, sourcing, and operating on-going panels/ communities of people who live with different chronic diseases. The ongoing panels/ communities include people living with HIV. These 'existing' panelists were supplemented by new panelists recruited during the survey

**HIV patient support groups/ charities (targeted sampling):**

Non-governmental organizations (NGOs), Patient Associations, Patient Advocacy Groups, Patient Support Groups or HIV Charities organized at local, national, or international level.

**Local Operating Company (LOC) (targeted sampling):**

In these cases, the recruitment resulted from contacts provided by the Sponsor company's Local Operating Company within the country, or where the questionnaire link was deployed directly by the LOC to contacts. These contacts were primarily NGOs/ Patient Advocacy Groups (but these numbers are not included in the figures for the above category).

**Patient-to-patient referrals (snow-ball sampling):**

Qualified participants to the study would also be asked to refer someone they may know with HIV, or if they are part of a support group if they can disseminate this among their members. In the recruitment partner's wider online panels/communities, members may have someone in their family or know of someone with HIV. If so, they may be asked to send study information and link to get in touch directly.

**Social media (Volunteer sampling):**

An 'advertisement' placed in the Facebook feeds of potential respondents. The advertisement related to generic recruitment of PLHIV to Opinion Health panels, not specifically to the PP2 study. These figures are separate to the 'Panel/community members' category above. Standard FB targeting tools available to all FB users were used (basic parameters available, such as region, age, and areas of interest).
