# Supplementary material for: Undetectable equals untransmittable (U = U): awareness and associations with health outcomes among people living with HIV in 25 countries
Source: PubMed Central journal article supplement — Sex Transm Infect. 2020 Jul 30;97(1):18–26. doi: 10.1136/sextrans-2020-054551 (PMC7841488; doi:10.1136/sextrans-2020-054551), 2020-07-30
Supplement: sextrans-2020-054551supp003.pdf [file sextrans-2020-054551supp003.pdf]

Online supplementary figure 1. Percentage of people living with HIV in 25 countries who reported having discussed U=U with their healthcare provider, overall and by gender, Positive Perspectives Study, 2019 (N = 2389)

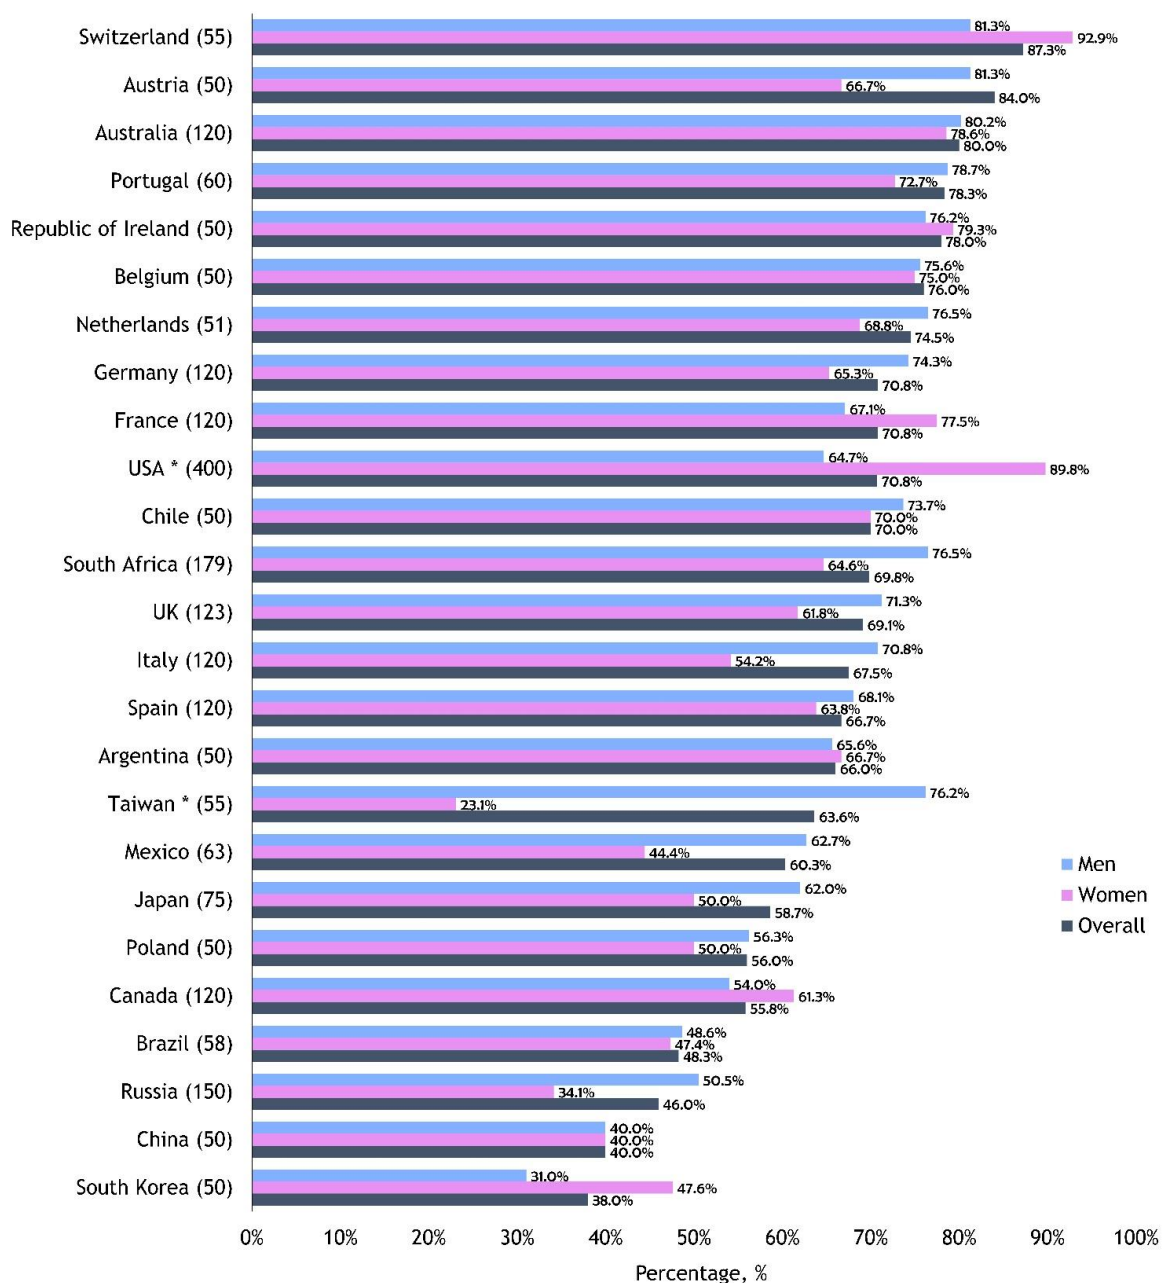

Note: Asterisks (\*) indicate statistically significant country-specific gender differences using  $\chi^2$  tests at  $p < 0.05$ .
