# Supplementary material for: Undetectable equals untransmittable (U = U): awareness and associations with health outcomes among people living with HIV in 25 countries
Source: PubMed Central journal article supplement — Sex Transm Infect. 2020 Jul 30;97(1):18–26. doi: 10.1136/sextrans-2020-054551 (PMC7841488; doi:10.1136/sextrans-2020-054551), 2020-07-30
Supplement: sextrans-2020-054551supp004.pdf [file sextrans-2020-054551supp004.pdf]

Online supplementary figure 2. Percentage of people living with HIV in 25 countries who reported sharing their HIV status, within four mutually exclusive strata of age and gender, Positive Perspectives Study, 2019

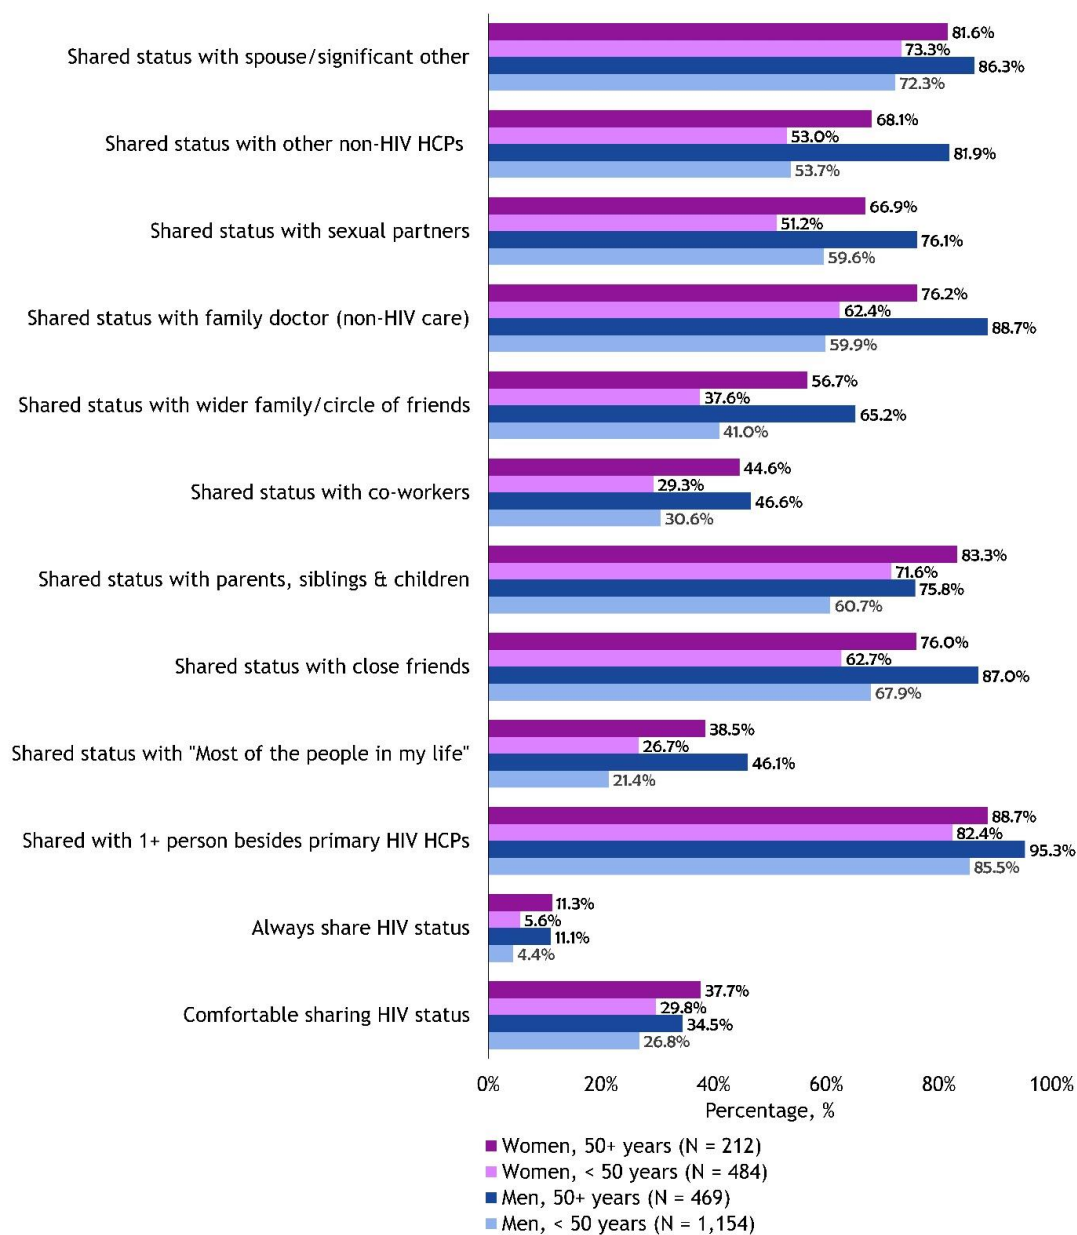

Note: All results were statistically significant using  $\chi^2$  tests, meaning that for each outcome assessed, at least two of the groups differed significantly at  $p < 0.05$ . Total sample size across the four strata does not add up to 2389 because of 70 respondents who identified with a gender other than 'man' or 'woman'
